# Supplementary material for: Regulation of PP2A, PP4, and PP6 holoenzyme assembly by carboxyl-terminal methylation
Source: PubMed Central journal article supplement (PMC8630191; doi:10.1038/s41598-021-02456-z), 2021-11-29

# 293T

## Total PP2A $\alpha/\beta$

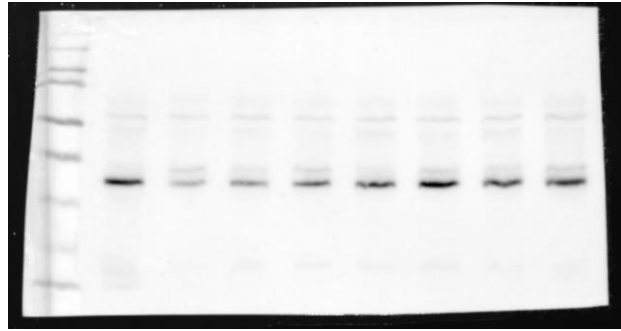

WT HM WT HM WT HM WT HM

## Ponceau

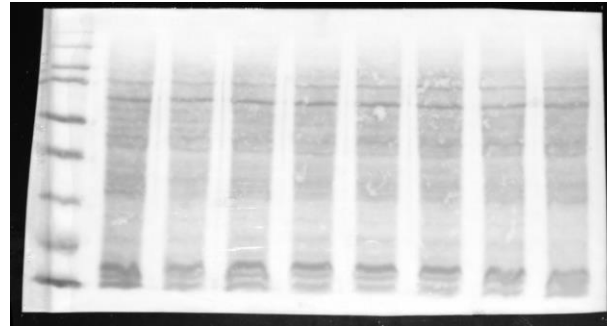

WT HM WT HM WT HM WT HM

## Methylated PP2A $\alpha/\beta$

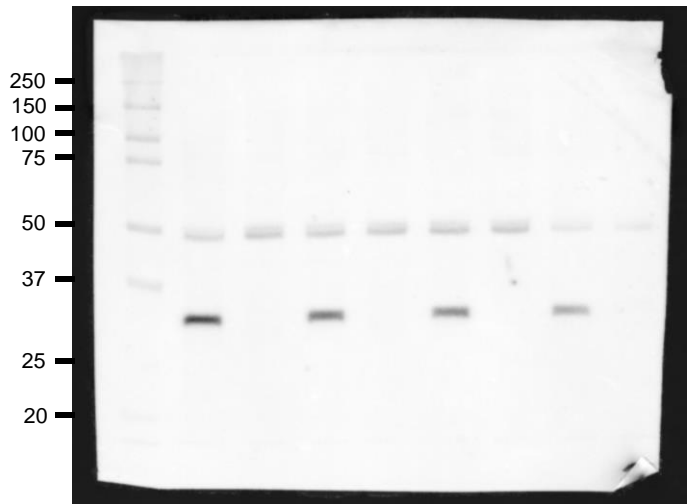

WT HM WT HM WT HM WT HM

## Ponceau

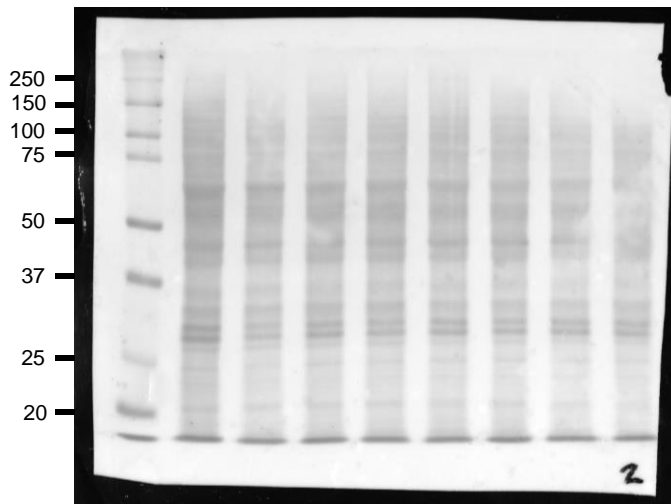

WT HM WT HM WT HM WT HM

\* non-specific band

293T

LCMT1

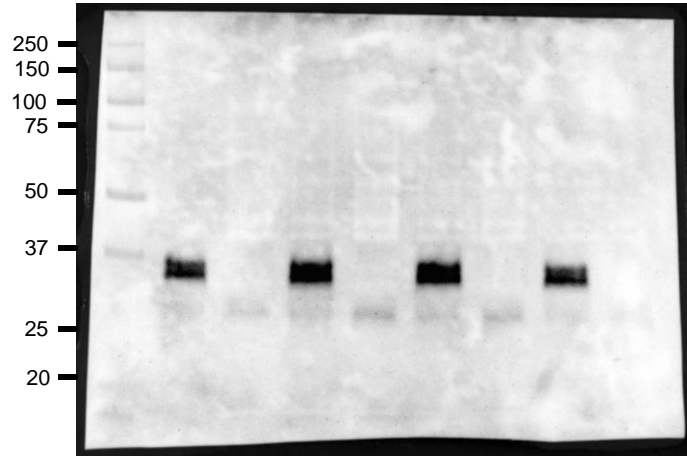

WT HM WT HM WT HM WT HM

Ponceau

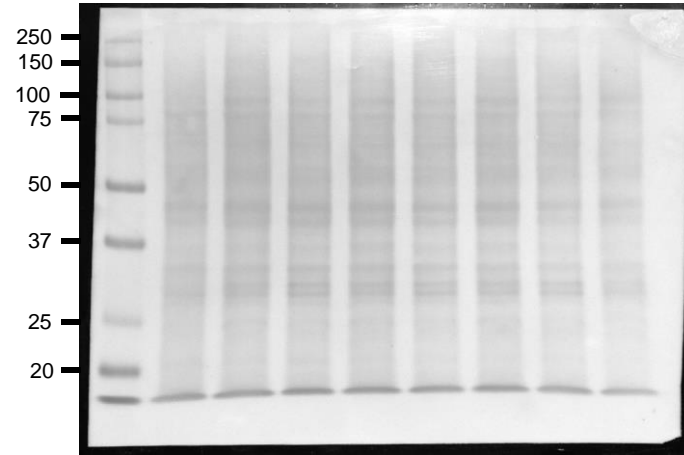

WT HM WT HM WT HM WT HM

B55 $\alpha$

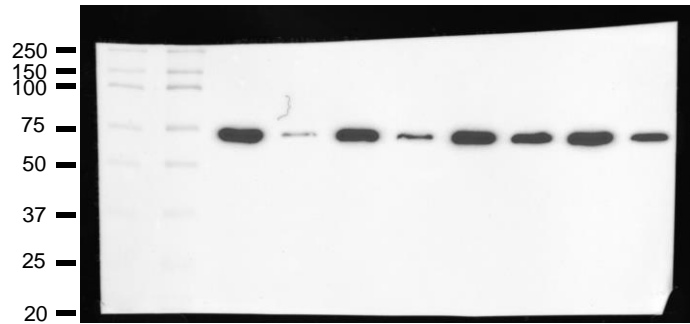

WT HM WT HM WT HM WT HM

Ponceau

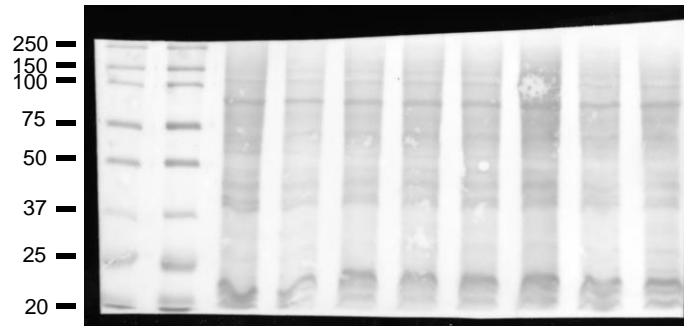

WT HM WT HM WT HM WT HM

# HeLa

## Total PP2A $\alpha/\beta$

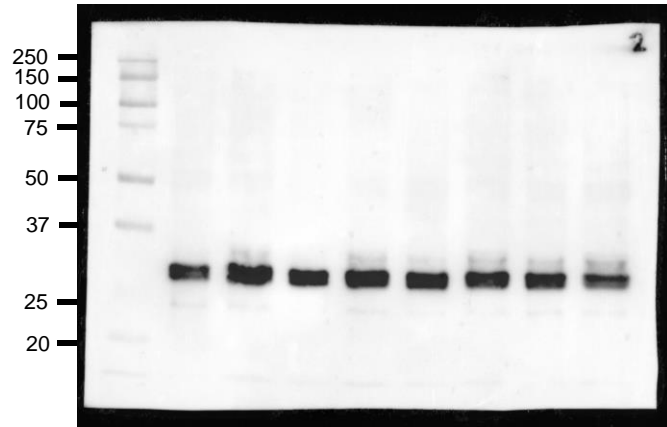

WT HM WT HM WT HM WT HM

## Ponceau

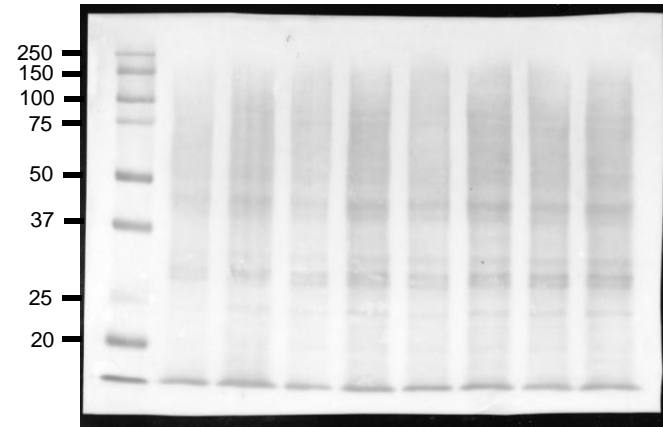

WT HM WT HM WT HM WT HM

## Methylated PP2A $\alpha/\beta$

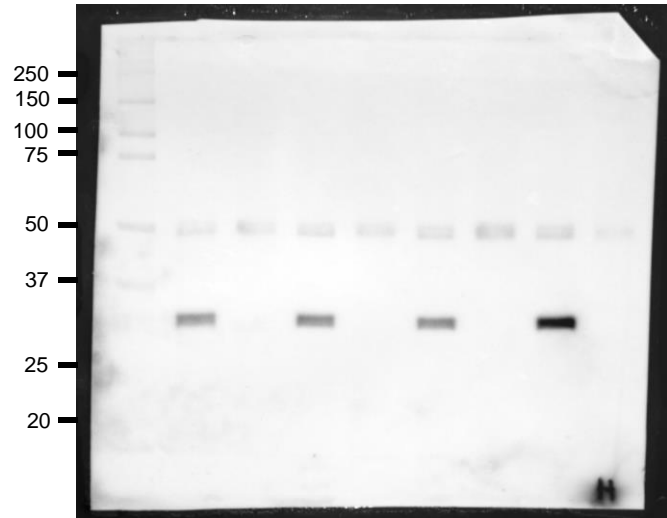

WT HM WT HM WT HM WT HM

## Ponceau

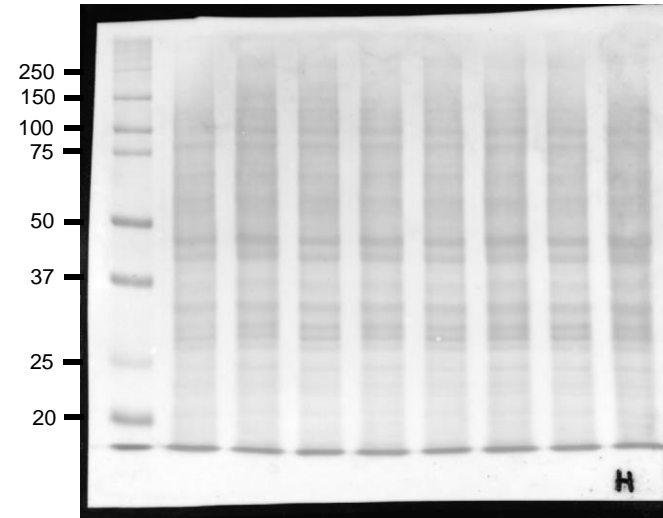

WT HM WT HM WT HM WT HM

\* non-specific band

HeLa

LCMT1

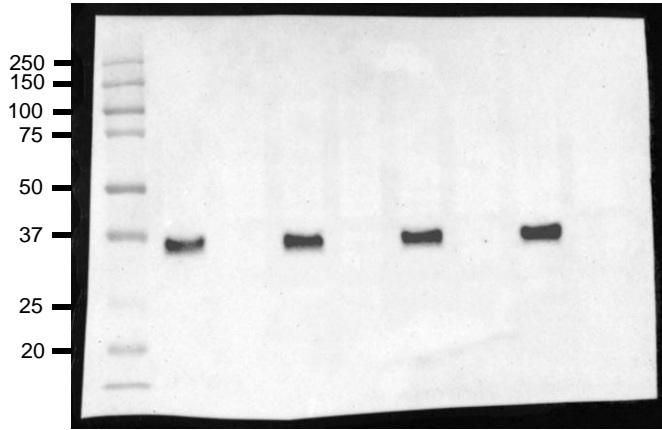

WT HM WT HM WT HM WT HM

Ponceau

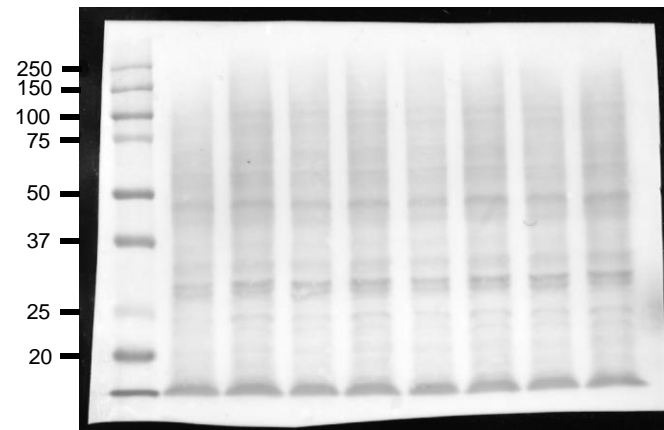

WT HM WT HM WT HM WT HM

# Rpe1

## Total PP2A $\alpha/\beta$

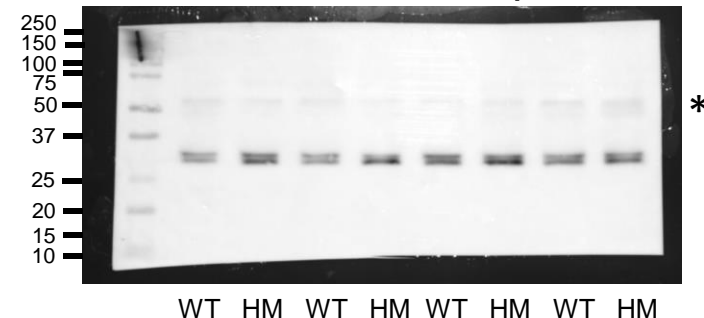

## Ponceau

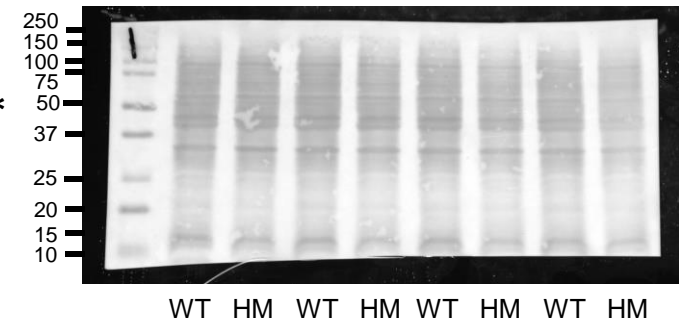

## Methylated PP2A $\alpha/\beta$

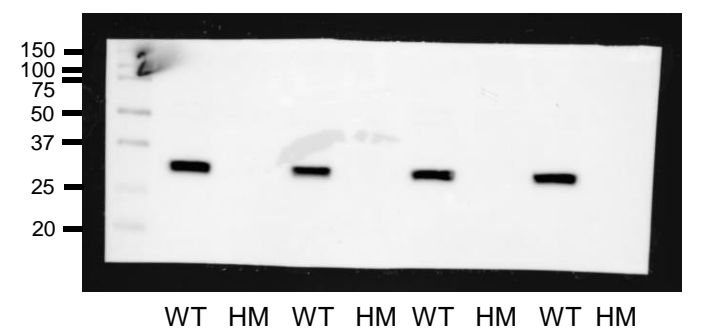

## Ponceau

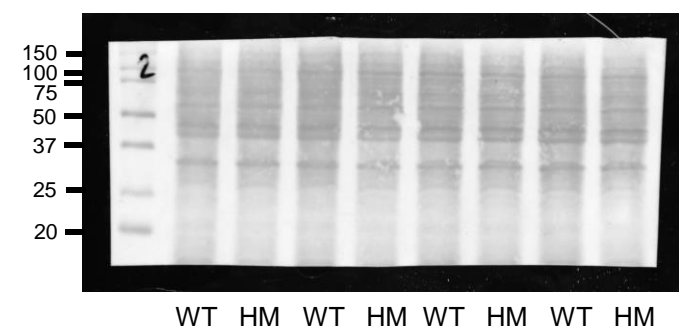

\* non-specific band

## LCMT1

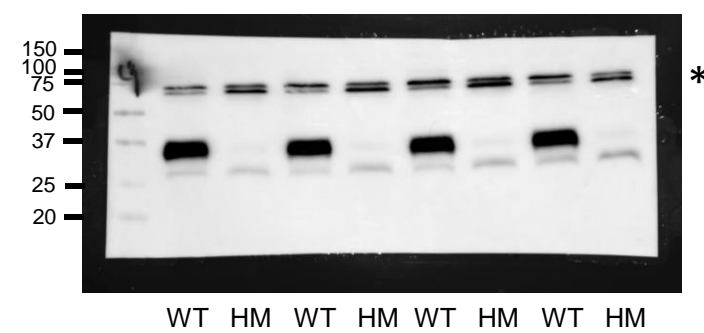

## Ponceau

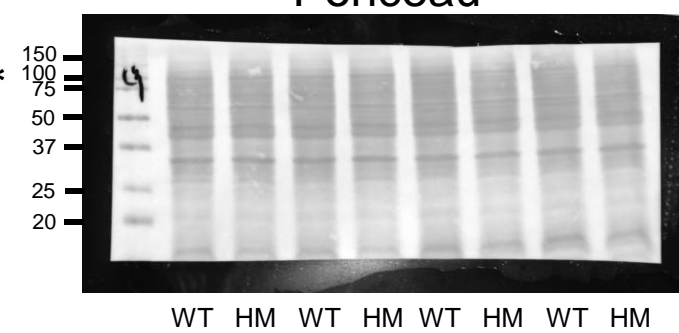

# Supplemental Figure 1: FLAG-PP2Ac $\beta$ blots

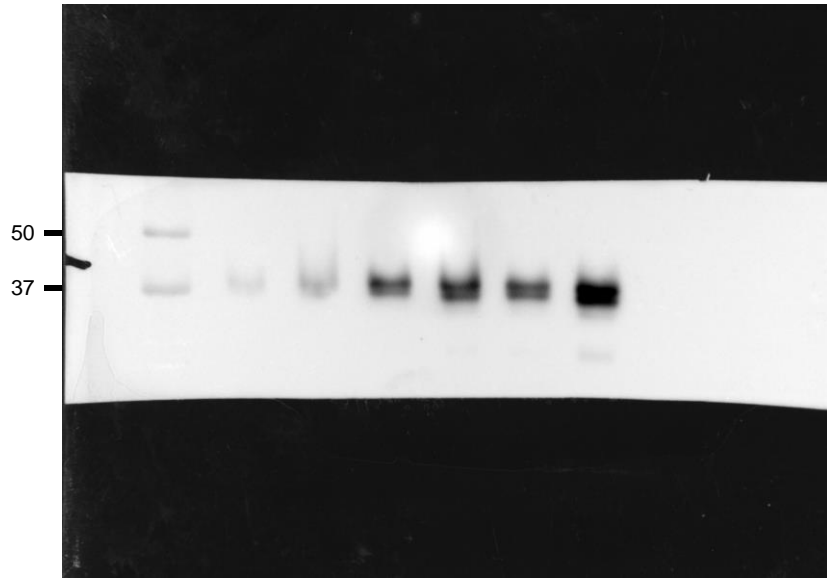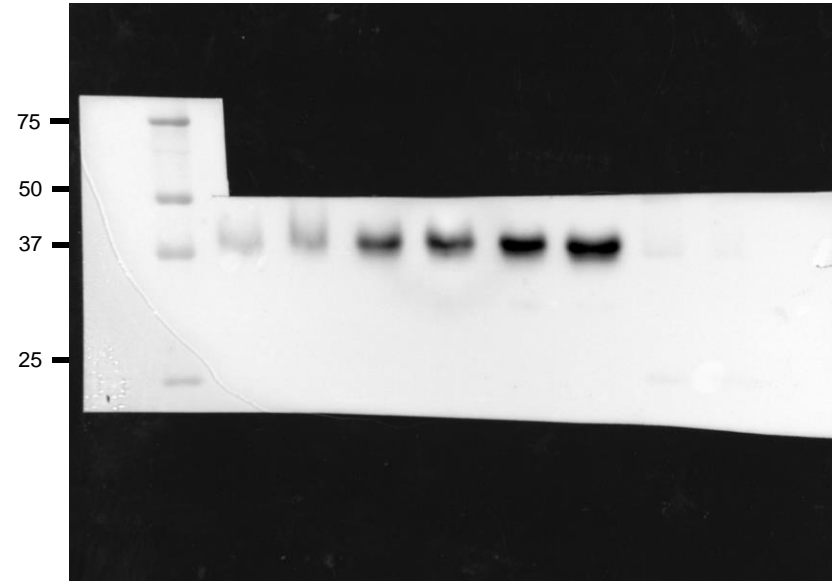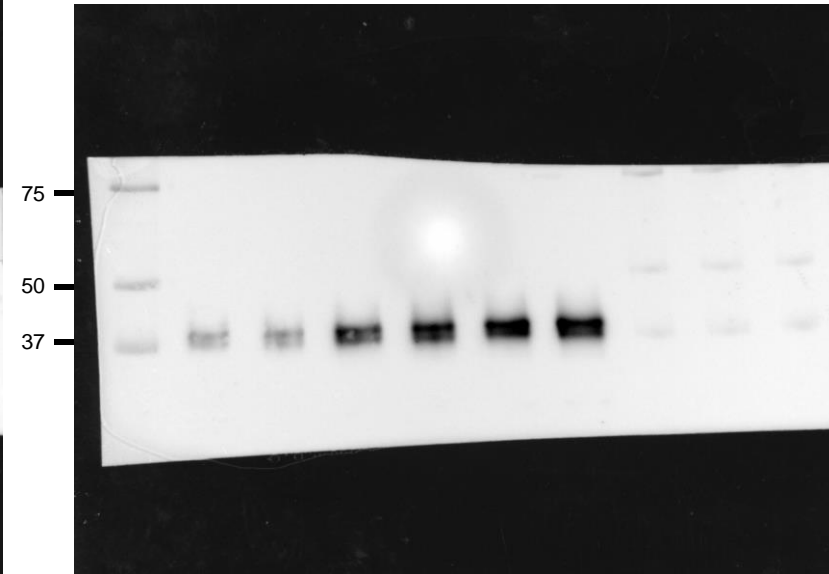

# Supplemental Figure 1: FLAG-PP4c blots

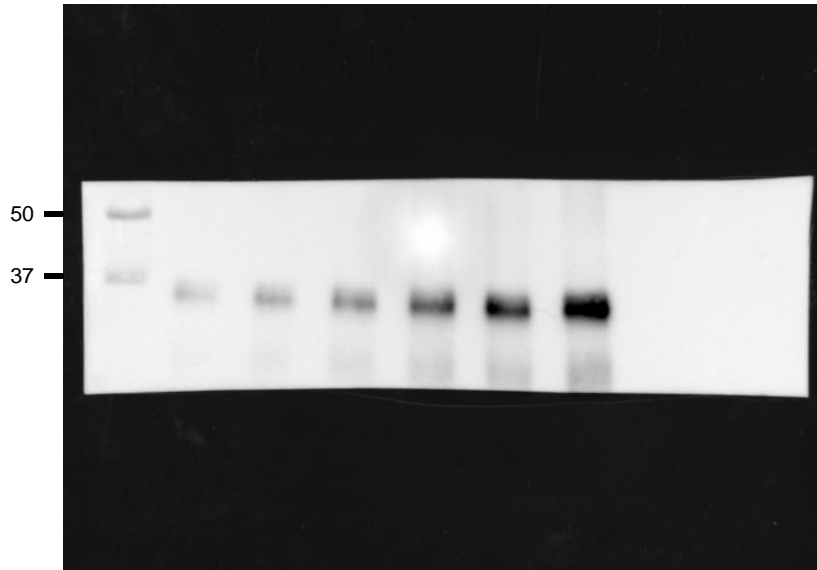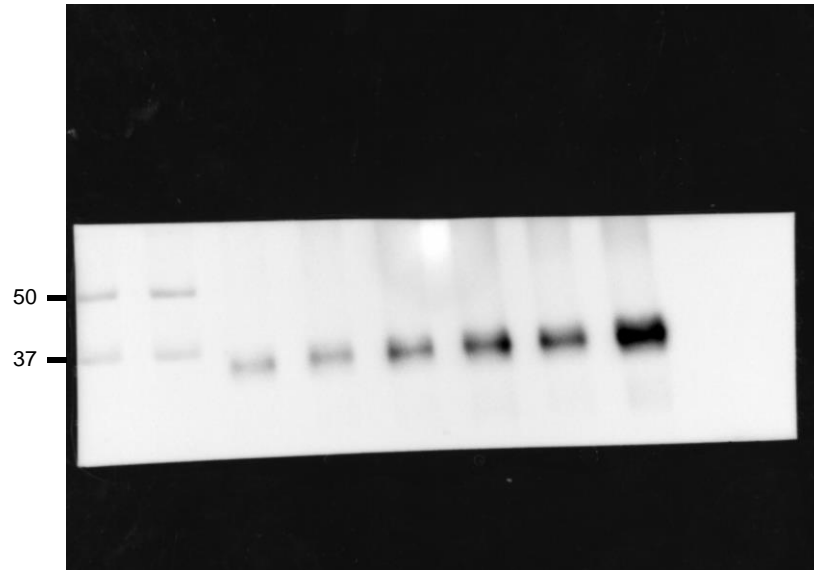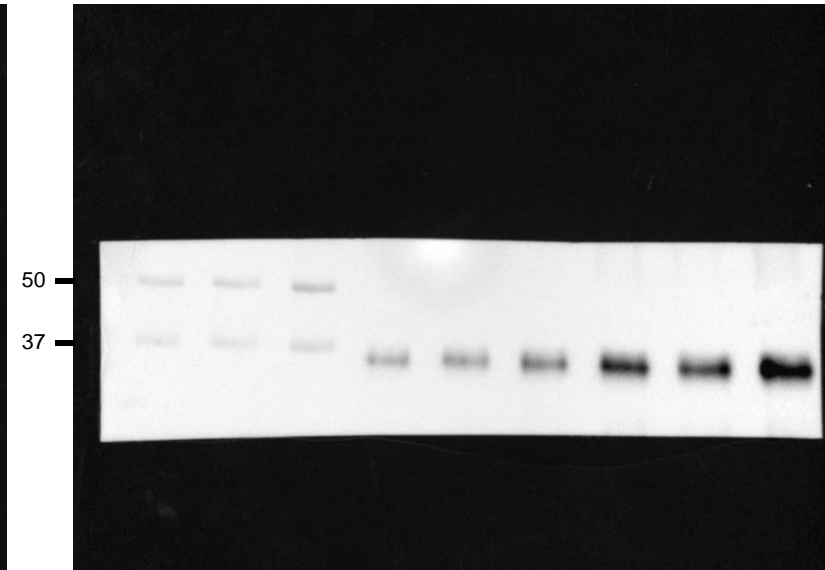

# Supplemental Figure 1: FLAG-PP6c blots

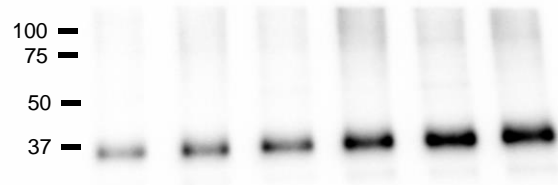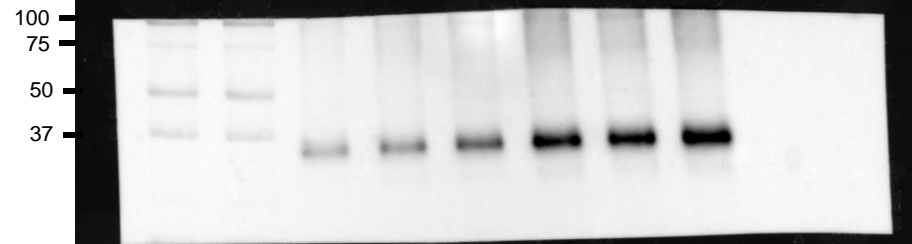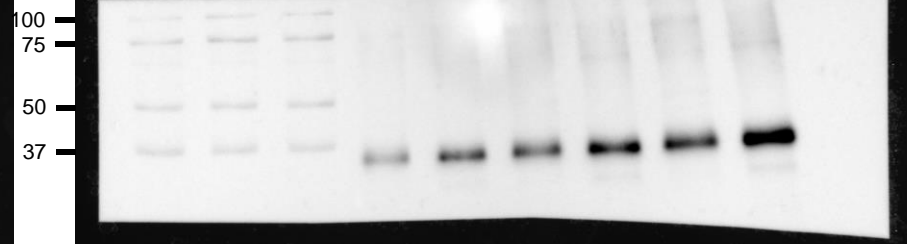

Supplement: 41598_2021_2456_MOESM11_ESM.pdf [file 41598_2021_2456_MOESM11_ESM.pdf]
