# Supplementary material for: Regulation of PP2A, PP4, and PP6 holoenzyme assembly by carboxyl-terminal methylation
Source: PubMed Central journal article supplement (PMC8630191; doi:10.1038/s41598-021-02456-z), 2021-11-29
Supplement: 41598_2021_2456_MOESM1_ESM.pdf [file 41598_2021_2456_MOESM1_ESM.pdf]

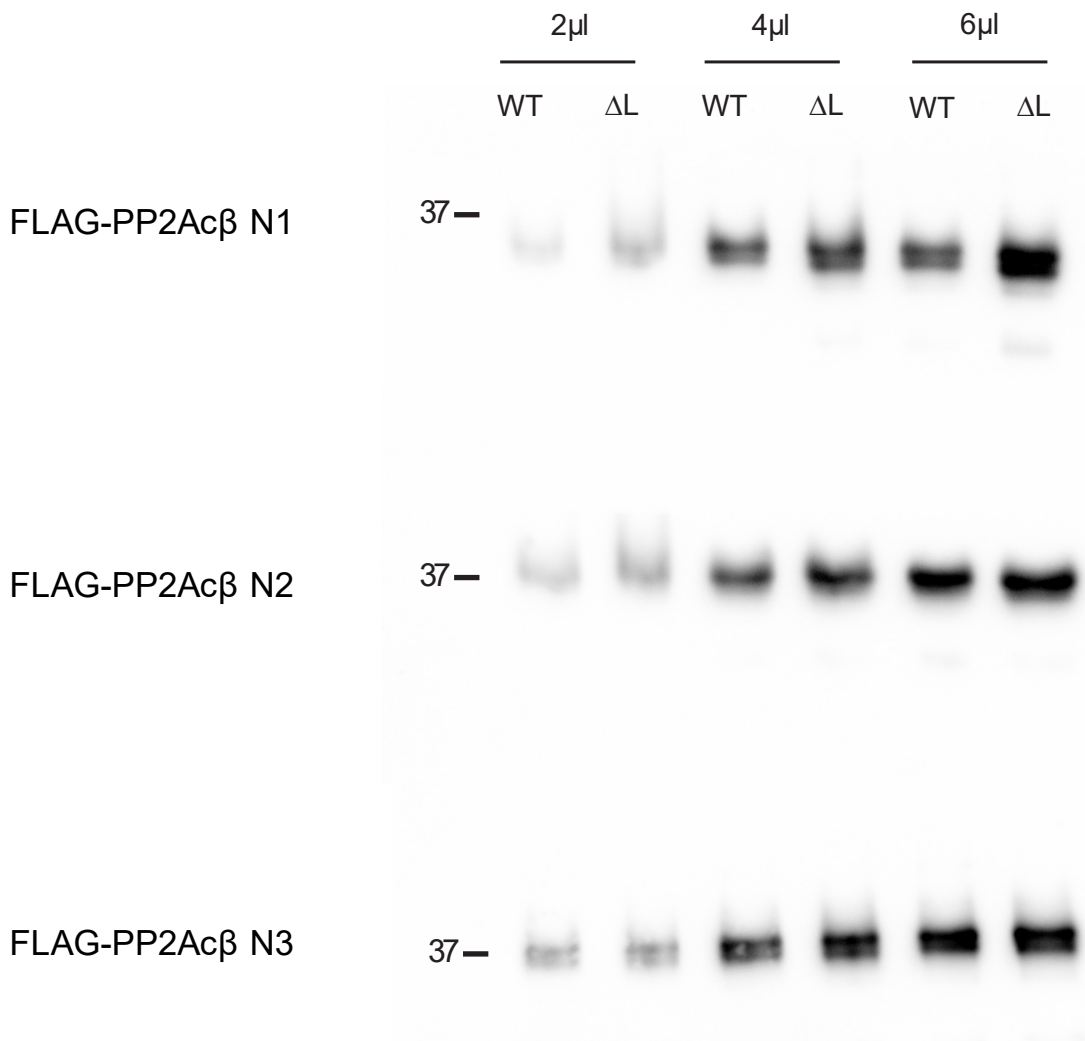

**Supp. Figure 1.** Purification of wild-type or  $\Delta L$  mutant catalytic subunits of PP2A. Western blots of affinity purified FLAG-PP2Ac $\beta$  wild-type and  $\Delta L$  mutant.
