# Supplementary material for: Regulation of PP2A, PP4, and PP6 holoenzyme assembly by carboxyl-terminal methylation
Source: PubMed Central journal article supplement (PMC8630191; doi:10.1038/s41598-021-02456-z), 2021-11-29
Supplement: 41598_2021_2456_MOESM2_ESM.pdf [file 41598_2021_2456_MOESM2_ESM.pdf]

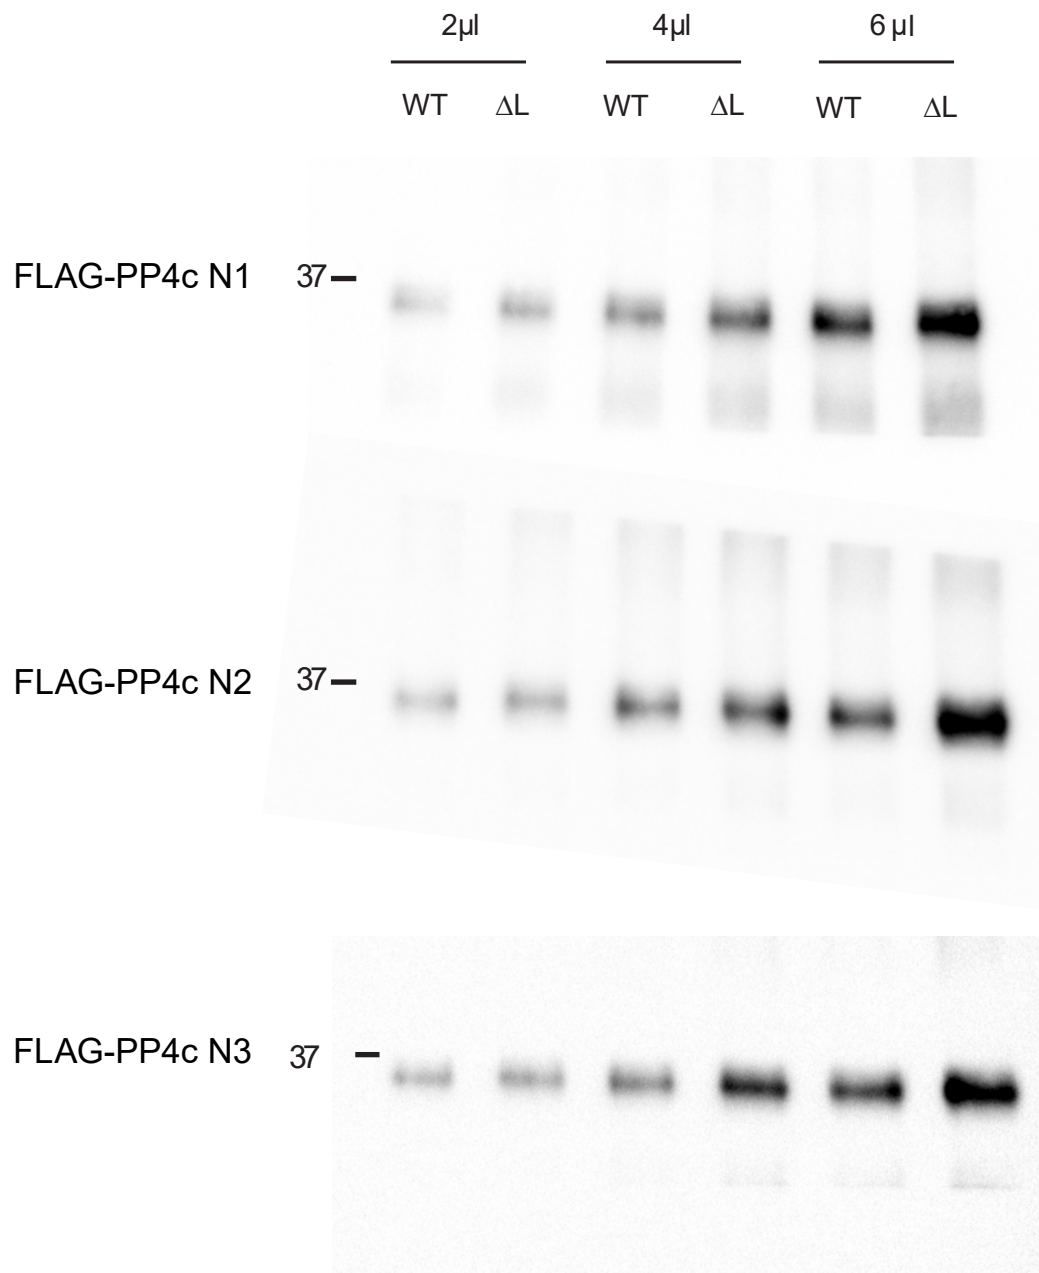

**Supp. Figure 2.** Purification of wild-type or  $\Delta$ L mutant catalytic subunits of PP4. Western blots of affinity purified FLAG-PP4c wild-type and  $\Delta$ L mutant.
